# Supplementary material
Source: MDPI journal article supplement (https://www.mdpi.com/2673-4583/14/1/7)
Supplement: s1 [file s1]

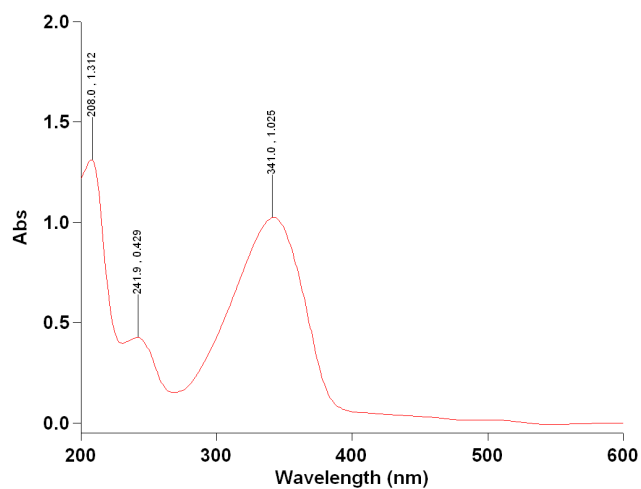

- a) *(2E,5E)*-2,5-bis(2-bromobenzylidene)cyclopentanone, (**2BrCP**) 100  $\mu$ L stock solution in 3 mL  $\text{CH}_3\text{CN}$ .

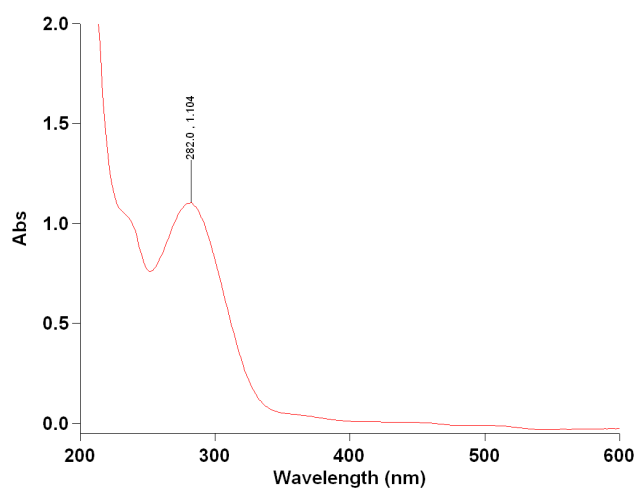

- b) *(2E,7E)*-2,7-bis(2-bromobenzylidene)cycloheptanone **2BrCH(ep)** 200  $\mu$ L stock solution in 3 mL  $\text{CH}_3\text{CN}$ .

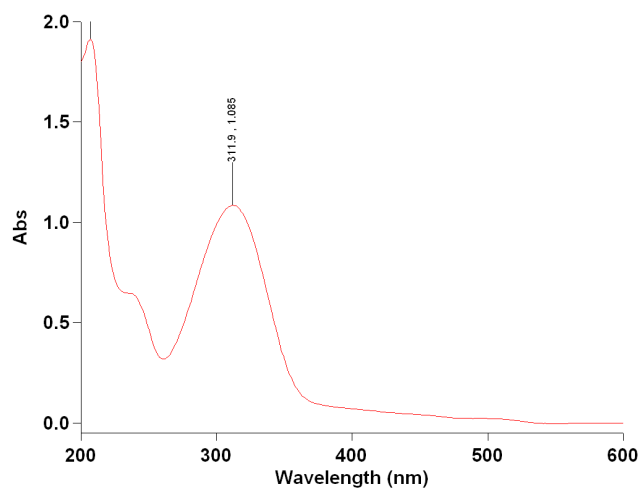

c) *(2E,6E)*-2,6-bis(2-bromobenzylidene)cyclohexanone (**2BrCX**, **B2BrBC**) 160  $\mu$ L stock solution in 3 mL  $\text{CH}_3\text{CN}$ .

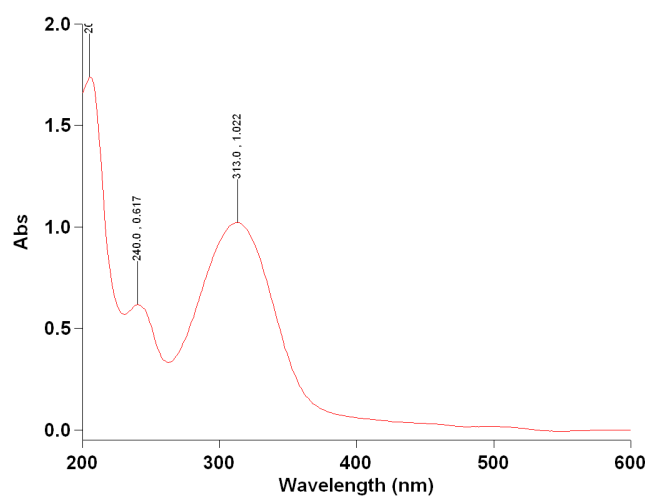

d) *(3E,5E)*-3,5-bis(2-bromobenzylidene)-4-piperidone, (**2Br4PIP**) 120  $\mu$ L stock solution in 3 mL  $\text{CH}_3\text{CN}$ .

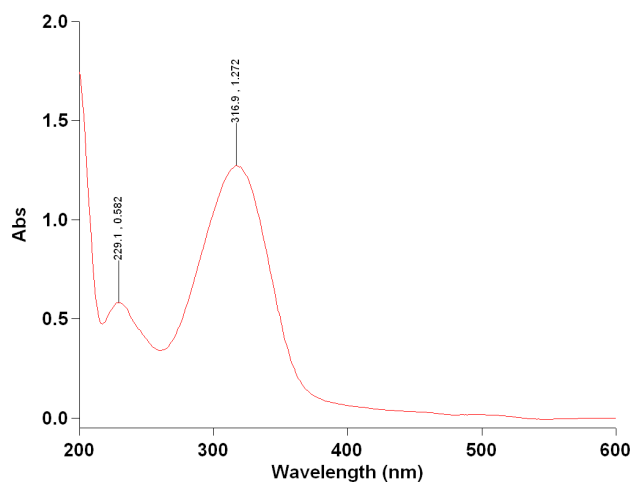

e) (3*E*,5*E*)-3,5-bis(2-fluorobenzylidene)-4-piperidone (**EF24**) 100  $\mu$ L stock solution in 3 mL  $\text{CH}_3\text{CN}$ .

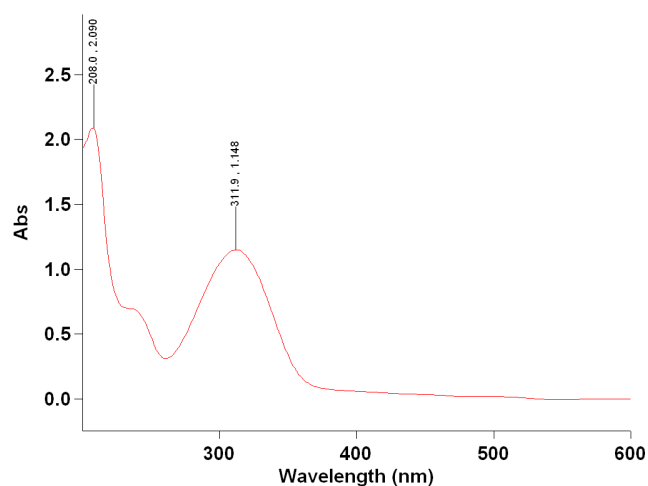

f) (2*E*,6*E*)-2,6-bis(2-bromobenzylidene)-4-*tert*-butyl-cyclohexanone (**4tB2BrCX**)\_180  $\mu$ L stock solution in 3 mL  $\text{CH}_3\text{CN}$ .

Figure S1. UV-Vis spectra of symmetrical MACs containing a 2-bromobenzylidene moiety and **EF24** in acetonitrile a)- f).

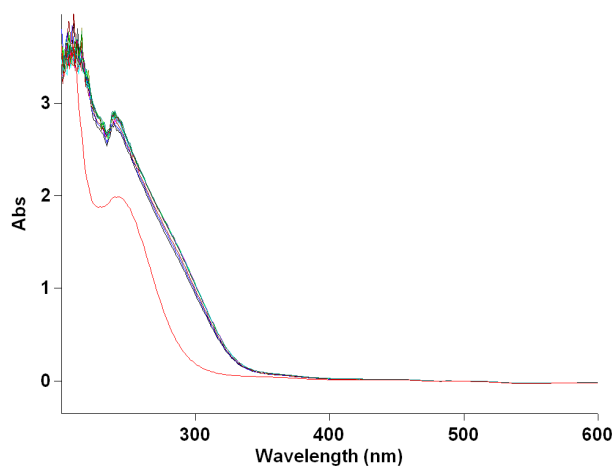

a) **2BrCH(ep)** 200 μL in + 2.5 mg/mL 2DMAESH (80/20 CH<sub>3</sub>CN/H<sub>2</sub>O)

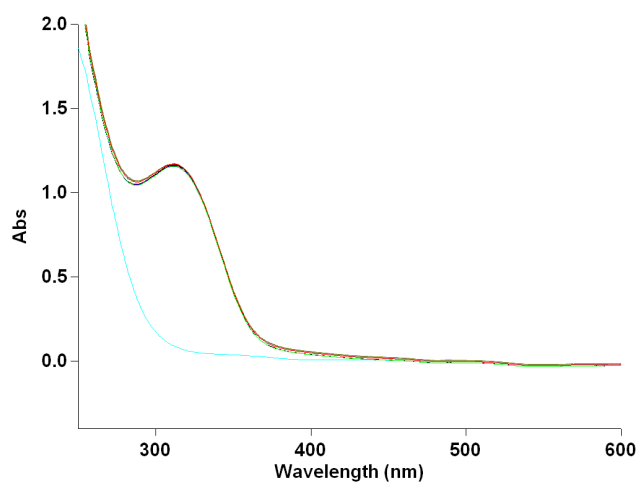

b) **4tB2BrCX** 180 μL + 2.5 mg/mL 2DMAESH (80/20 CH<sub>3</sub>CN/H<sub>2</sub>O) (blue trace) (3 hours).

Figure S2. UV-VIS spectra of MACs added to 2-(dimethylamino)ethanethiol (2DMAESH) (2.5 mg/mL) in 80:20 acetonitrile/H<sub>2</sub>O a) and b). The blue trace in b) is from only 2.5 mg/mL 2DMAESH in 80:20 acetonitrile/H<sub>2</sub>O.
